# Supplementary material for: Integrative analyses of multi-omics data constructing tumor microenvironment and immune-related molecular prognosis model in human colorectal cancer
Source: PubMed Central journal article supplement — Heliyon. 2024 Jun 8;10(12):e32744. doi: 10.1016/j.heliyon.2024.e32744 (PMC11226854; doi:10.1016/j.heliyon.2024.e32744), 2024-06-08
Supplement: mmc2.pdf [file mmc2.pdf]

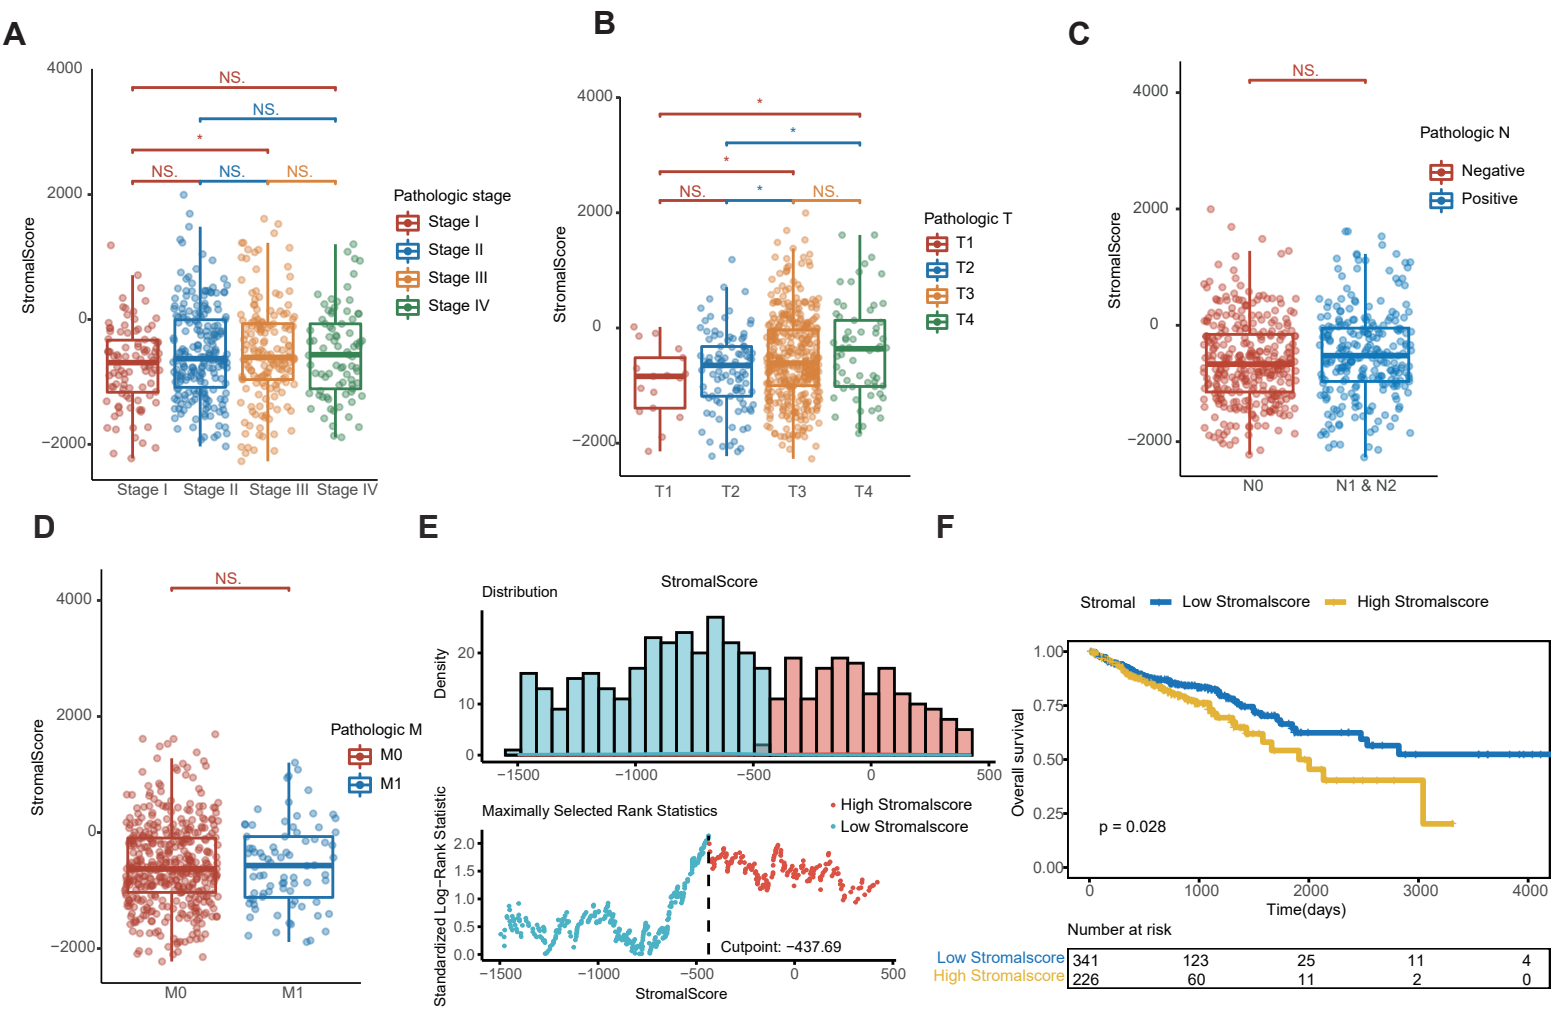

Figure S2 The distributions of stromal scores on the (A) TNM stage, (B) pathologic T stage, (C) pathologic N stage, (D) pathologic M stage, and (E) survival status. (F) Kaplan-Meier curves show the independent relevance between overall survival time and stromal scores.
