# Supplementary material for: Integrative analyses of multi-omics data constructing tumor microenvironment and immune-related molecular prognosis model in human colorectal cancer
Source: PubMed Central journal article supplement — Heliyon. 2024 Jun 8;10(12):e32744. doi: 10.1016/j.heliyon.2024.e32744 (PMC11226854; doi:10.1016/j.heliyon.2024.e32744), 2024-06-08
Supplement: mmc3.pdf [file mmc3.pdf]

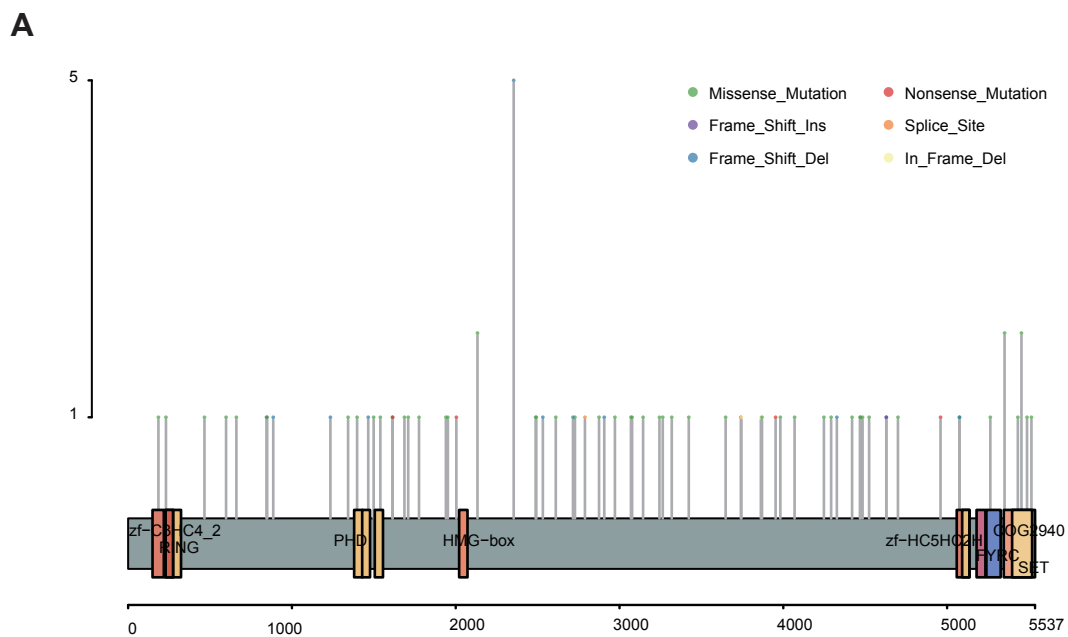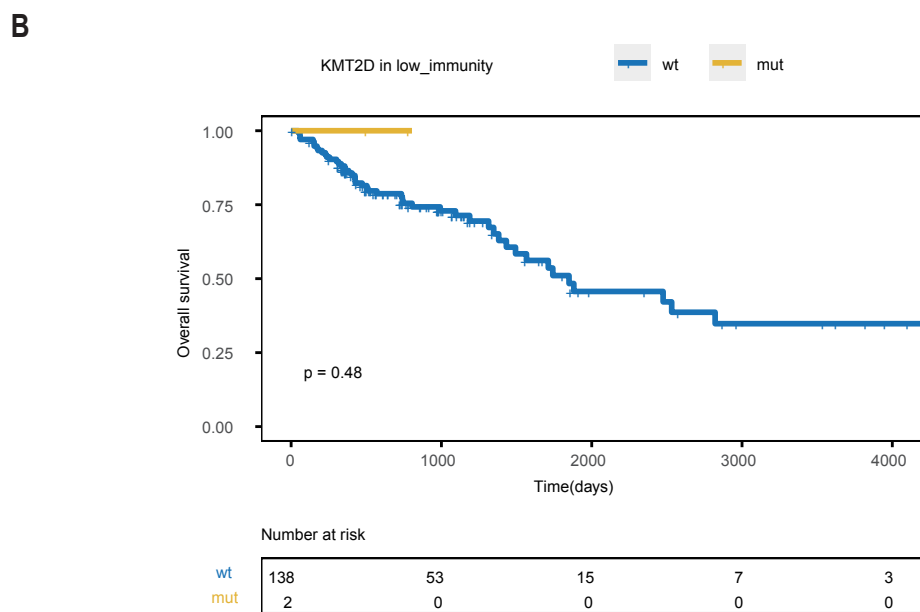

Figure S3 (A) The lollipop plot illustrates the distribution of KMT2D in high-immunity cohort. (B) Kaplan-Meier curves show the independent relevance between overall survival time and KMT2D mutation in low-immunity cohort.
