# Supplementary material for: Integrative analyses of multi-omics data constructing tumor microenvironment and immune-related molecular prognosis model in human colorectal cancer
Source: PubMed Central journal article supplement — Heliyon. 2024 Jun 8;10(12):e32744. doi: 10.1016/j.heliyon.2024.e32744 (PMC11226854; doi:10.1016/j.heliyon.2024.e32744), 2024-06-08
Supplement: mmc4.pdf [file mmc4.pdf]

**A**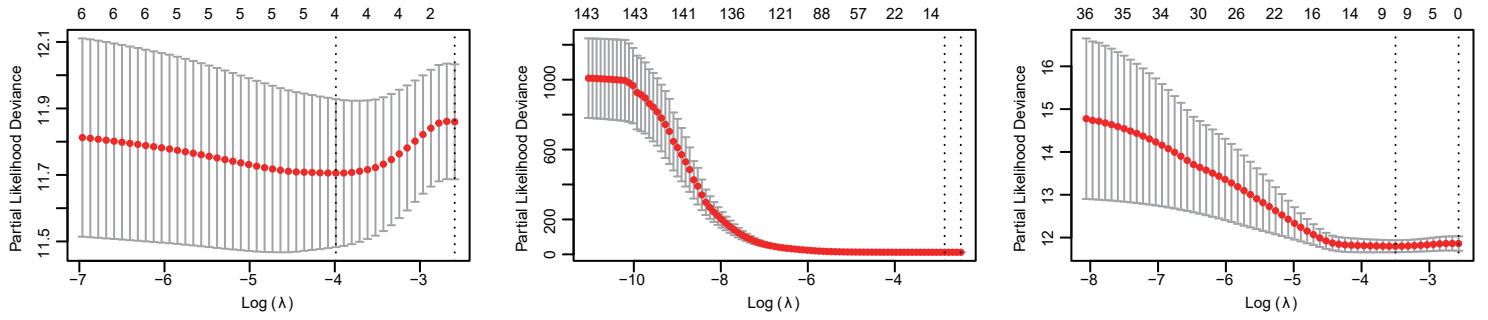**B**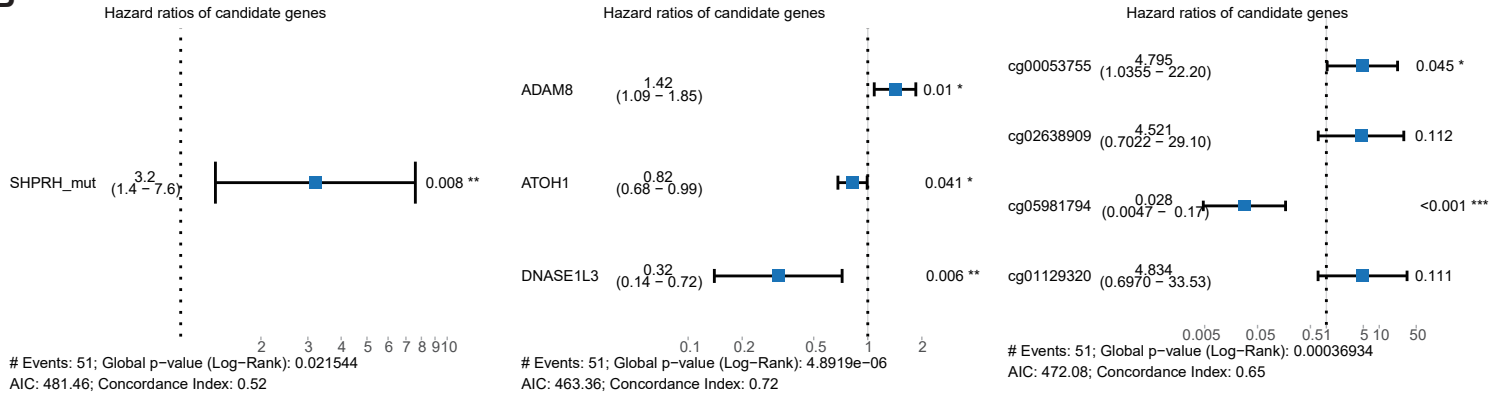**C**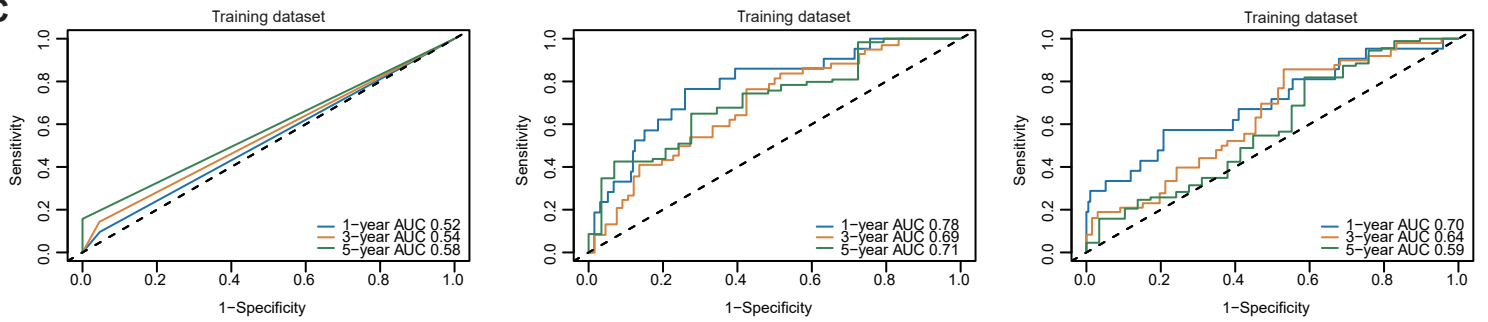**D**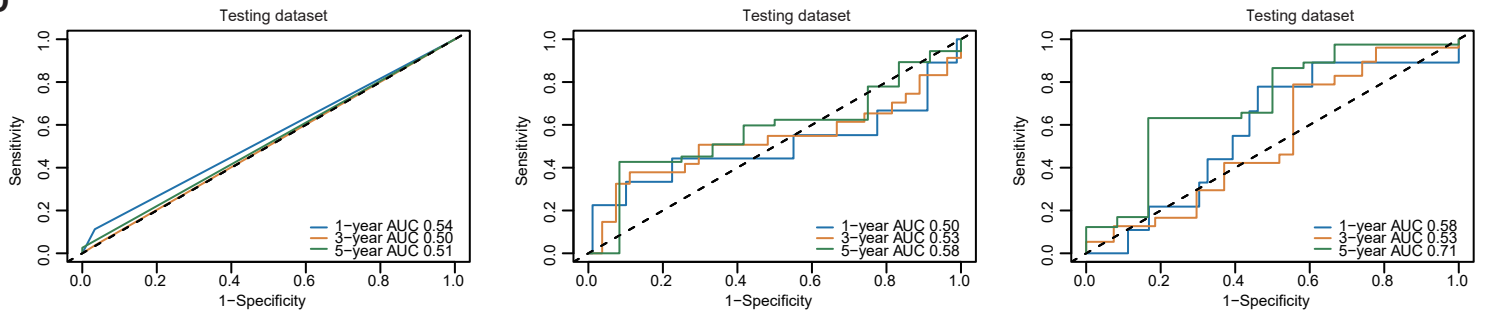

Figure S4 The performance of the uni-omics model of RNA-seq (left), WES (middle), and methylation profiles (right). (A) Identification of the optimal penalization coefficient lambda in the Lasso regression model. (B) Forest plot of the prognostic impact of the candidate variables. (C-D) ROC curves of the risk score for predicting 1-year, 3-year, and 5-year survival in (C) training and (D) testing dataset.
