# Supplementary material for: Integrative analyses of multi-omics data constructing tumor microenvironment and immune-related molecular prognosis model in human colorectal cancer
Source: PubMed Central journal article supplement — Heliyon. 2024 Jun 8;10(12):e32744. doi: 10.1016/j.heliyon.2024.e32744 (PMC11226854; doi:10.1016/j.heliyon.2024.e32744), 2024-06-08
Supplement: mmc5.pdf [file mmc5.pdf]

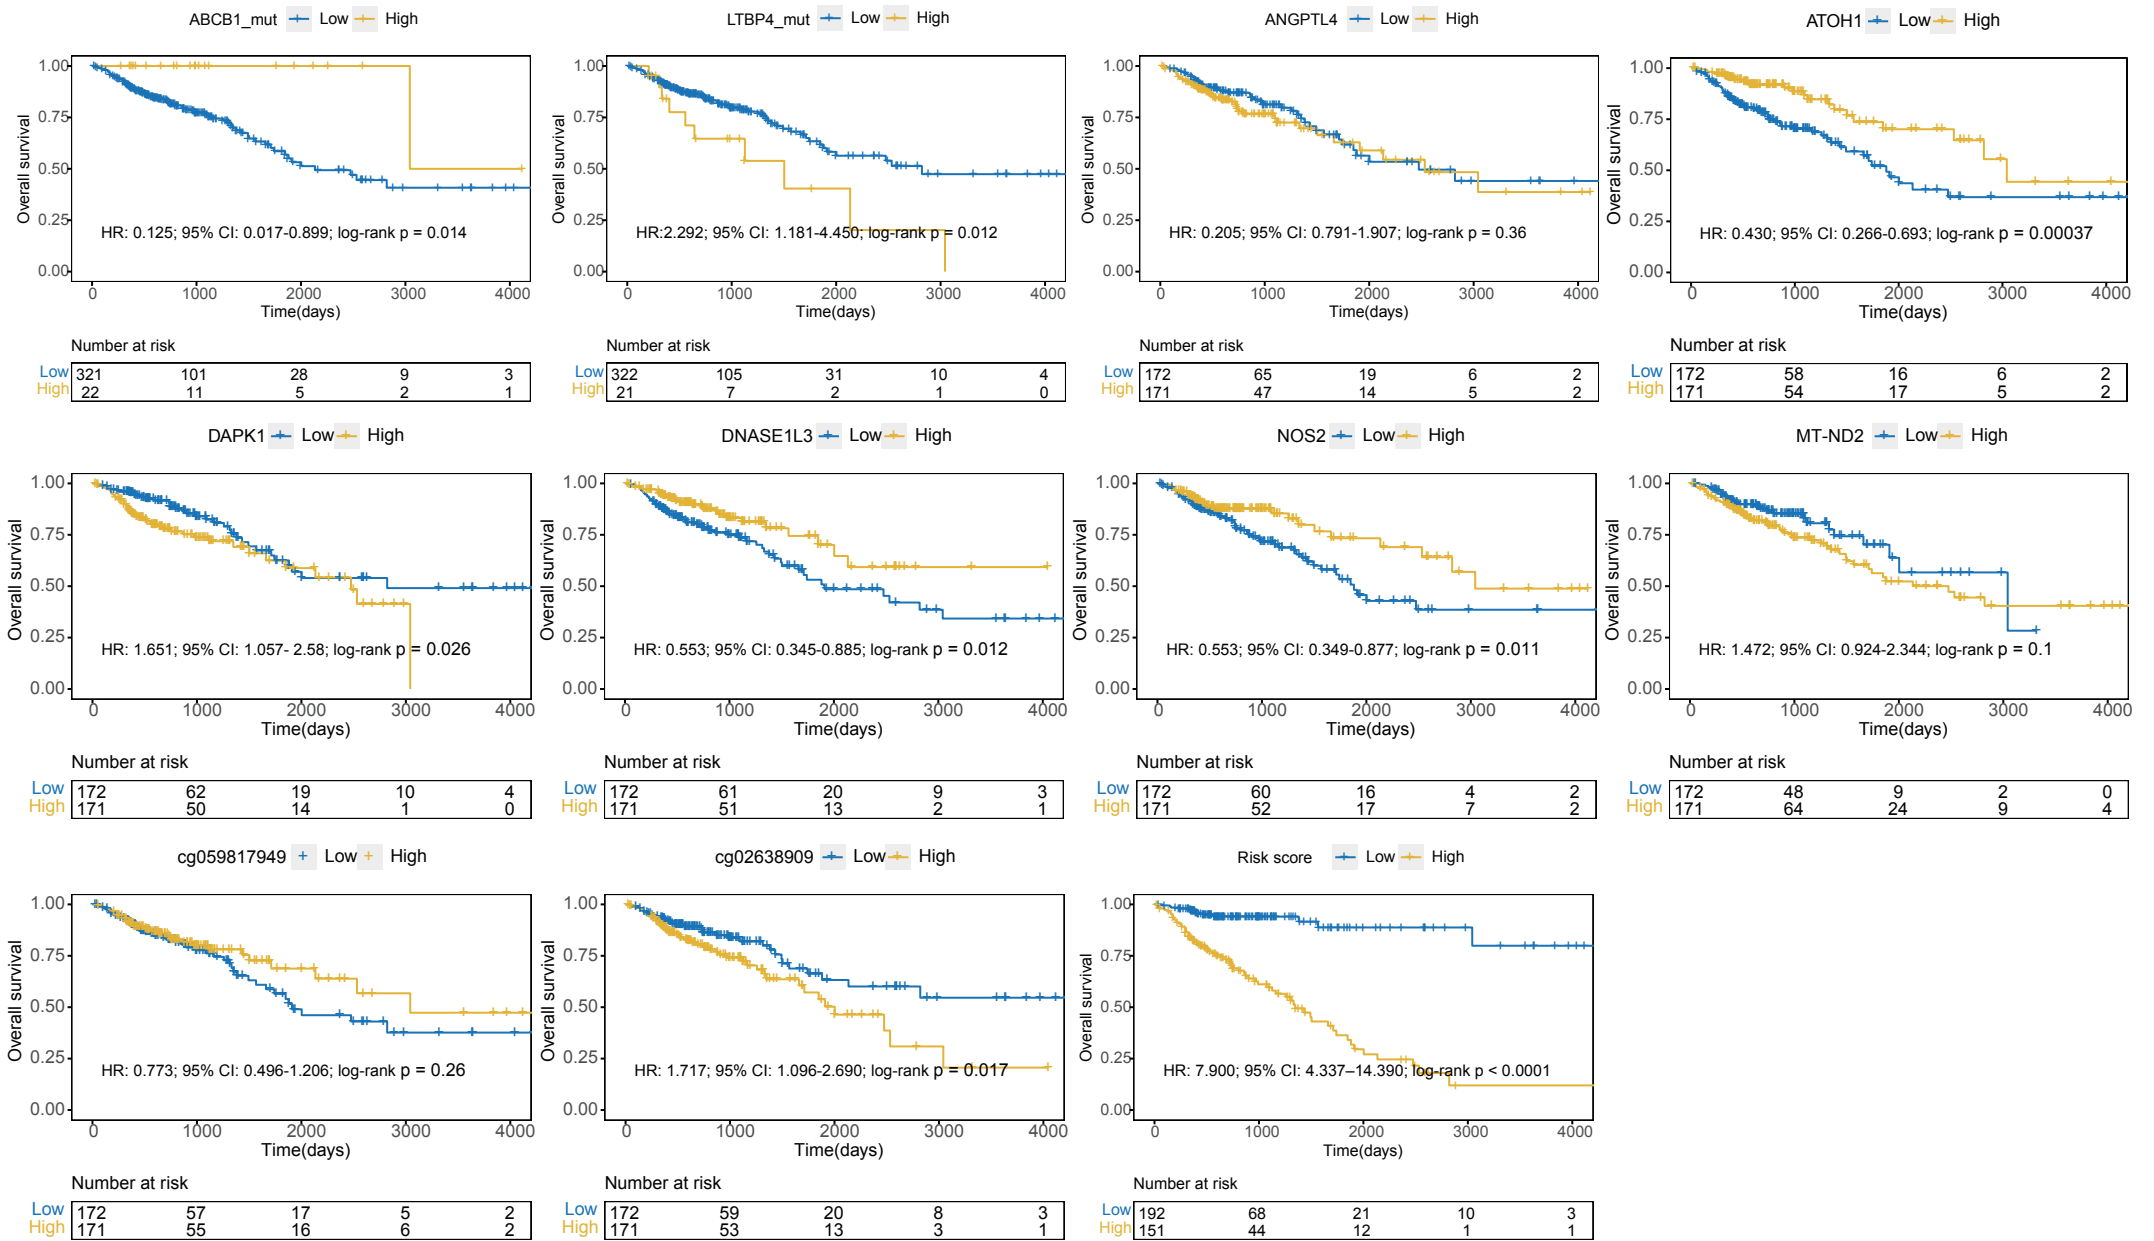

Figure S5 Kaplan-Meier curves show the independent relevance between overall survival time and candidate variables in whole TCGA COADREAD dataset.
